# Supplementary material for: Calculation of level alignments at dye-semiconductor interfaces: the role of exact exchange in density functional theory
Source: Research Square preprint supplement (doi:10.21203/rs.3.rs-7255685/v1), 2025-08-12
Supplement: Supplementary file 1 [file c7b76bf4707b2fd50280a325.pdf]

# Calculation of level alignments at dye-semiconductor interfaces: the role of exact exchange in density functional theory

Natalia Belen<sup>1\*</sup> and Hilke Bahmann<sup>1†</sup>

<sup>1</sup>Physical and Theoretical Chemistry, Bergische Universität Wuppertal,  
Street, Wuppertal, 42119, State, Germany.

\*Corresponding author(s). E-mail(s): [belen@uni-wuppertal.de](mailto:belen@uni-wuppertal.de);  
[bahmann@uni-wuppertal.de](mailto:bahmann@uni-wuppertal.de);

†These authors contributed equally to this work.

- 1 HOMO-LUMO gaps of TiO<sub>2</sub> cluster**
- 2 UV-Vis spectra and structures**
- 3 Level alignments**

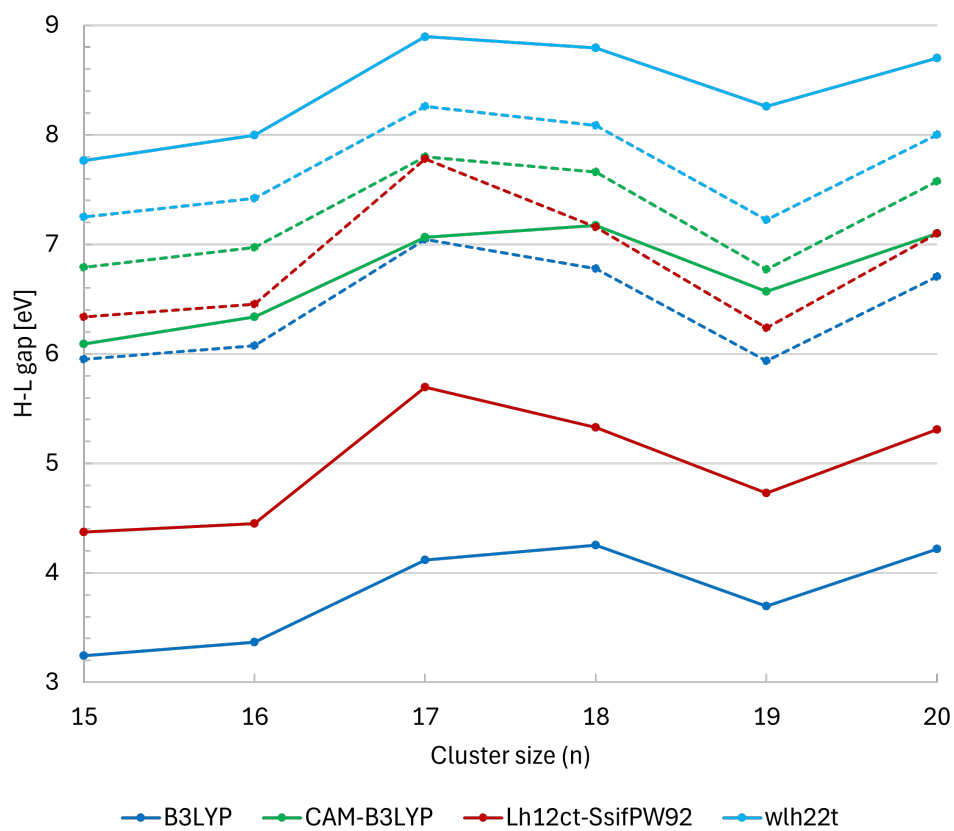

**Fig. 1** HOMO-LUMO (H-L) gaps of the  $(\text{TiO}_2)_n$  clusters,  $n=15-20$ , calculated with B3LYP, CAM-B3LYP, Lh12ct-SsifPW92 and  $\omega$ lh22t.  $G_0W_0$  (dashed line) calculations were started from each DFT calculation as reference.

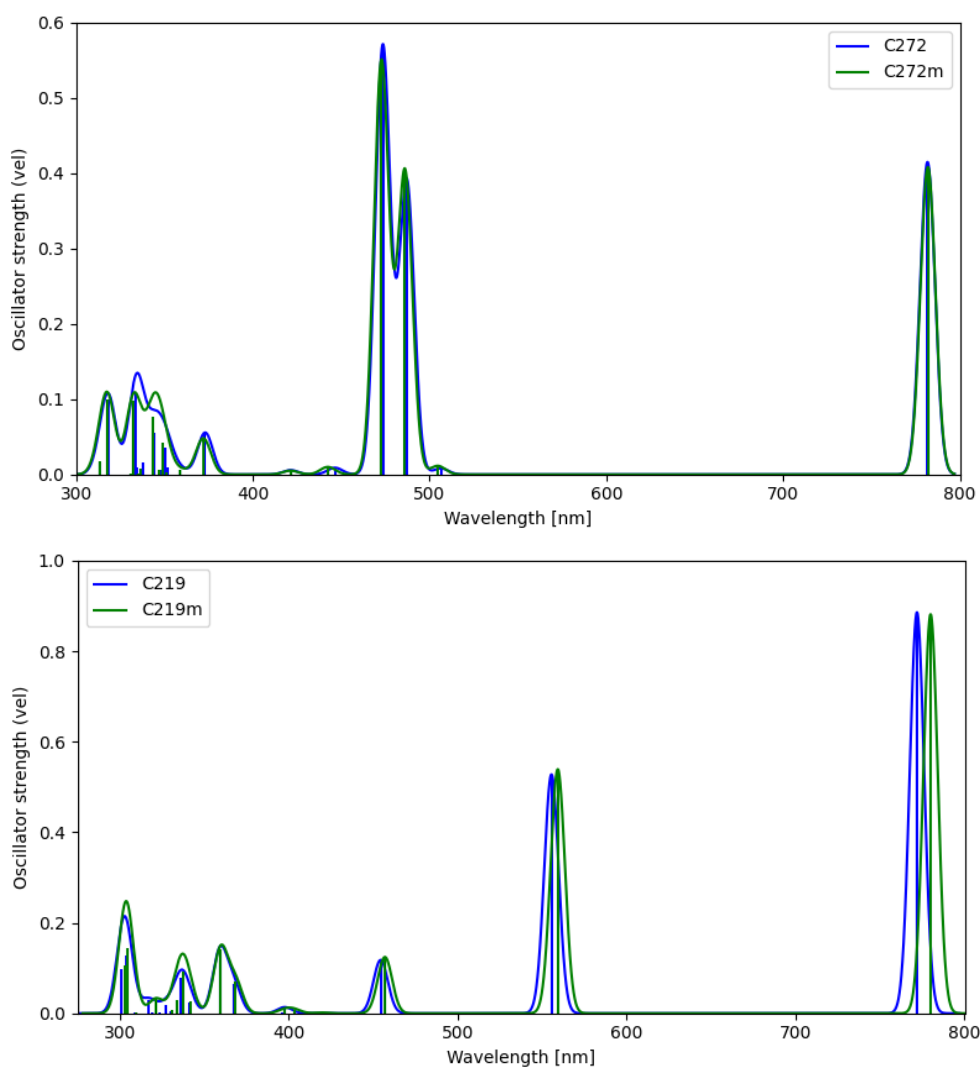

**Fig. 2** UV-Vis spectra of the original dyes, C272 and C219 and their modified versions, C272m and C219m calculated with TD-B3LYP/6-31G(ACN)//B3LYP/6-31G(ACN). All spectra have been broadened with a Gaussian distribution.

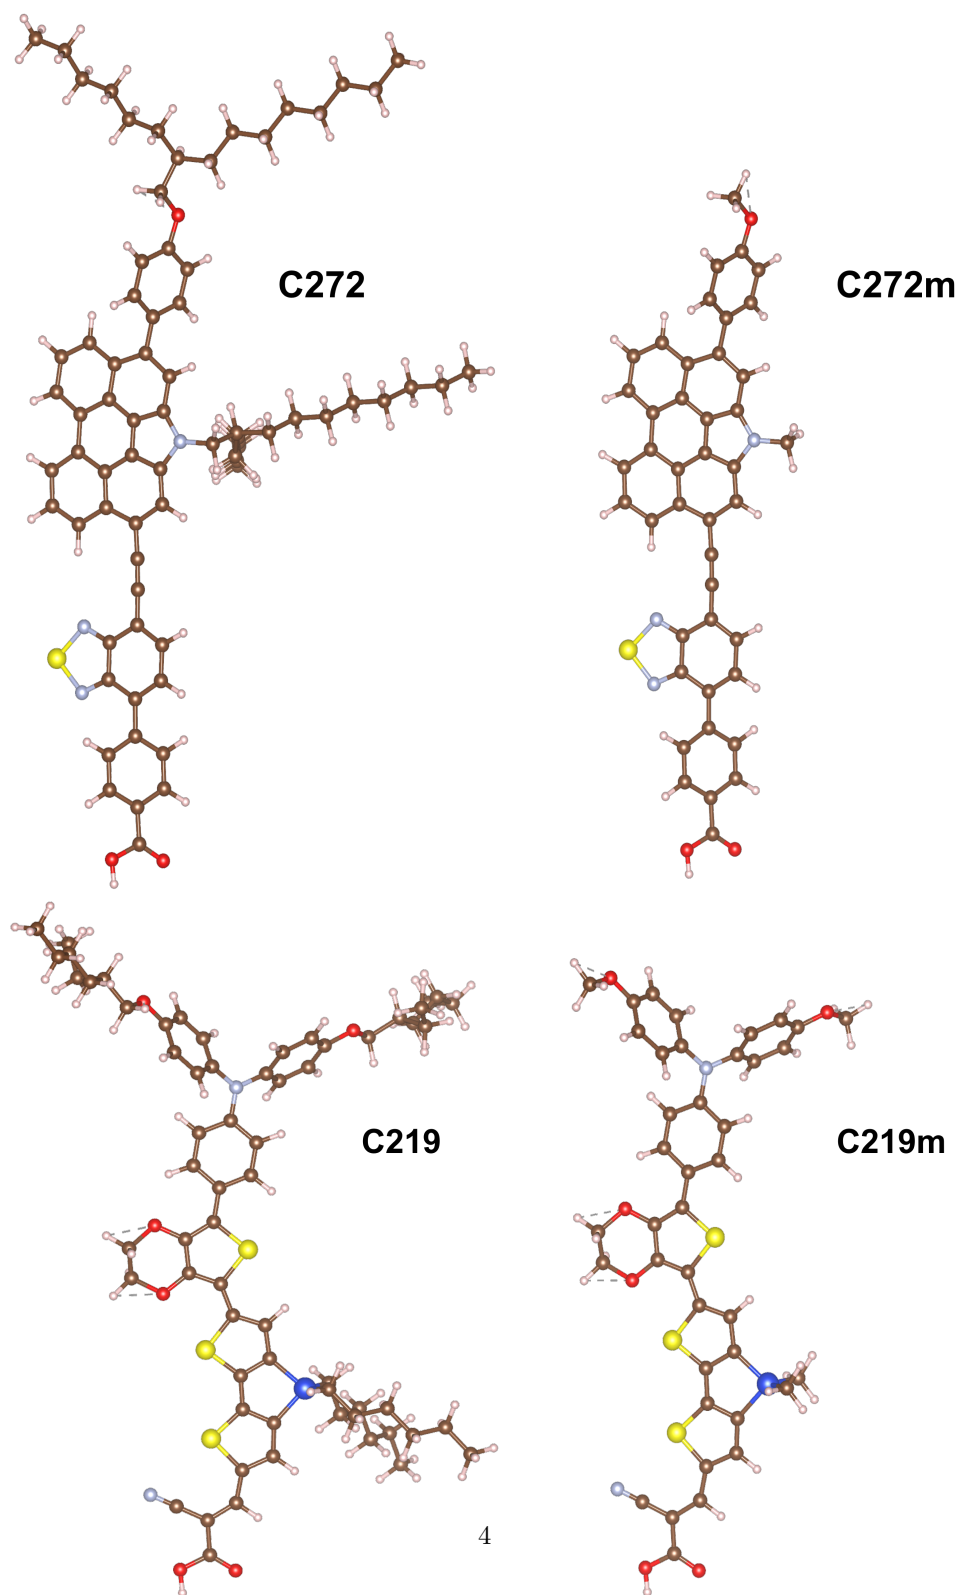

**Fig. 3** Optimized molecular structures of the original dyes, C272 and C219 and their modified versions, C272m and C219m calculated with B3LYP/6-31G(ACN).

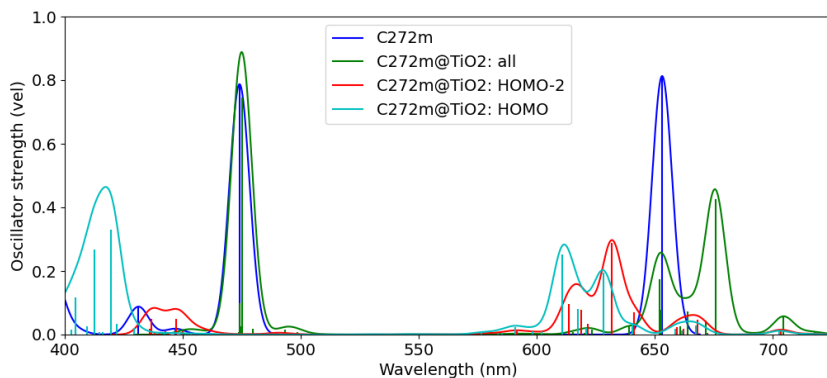

**Fig. 4** UV-Vis spectra of C272m (blue) and C272m@TiO<sub>2</sub> calculated with TD-B3LYP/def2-SVP(ACN)//B3LYP/def2-SVP(ACN). All spectra have been broadened with a Gaussian distribution. Allowing excitations from all orbitals (all, green), allowing excitations up to HOMO-2 (HOMO-2, red) and allowing excitations only from the HOMO (HOMO, turquoise) are shown.

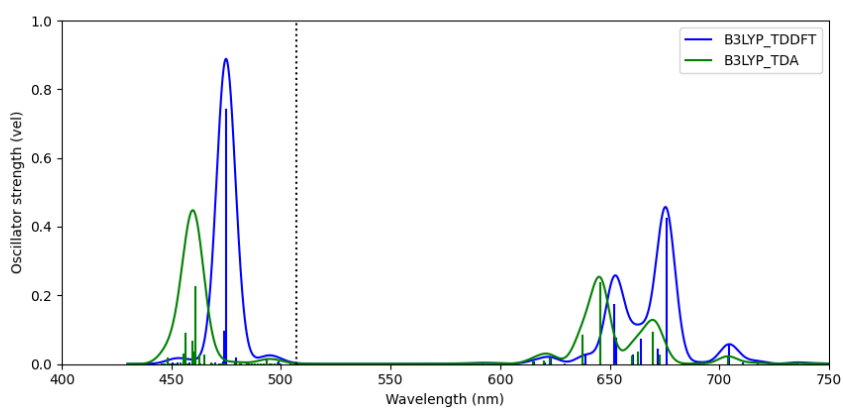

**Fig. 5** UV-Vis spectra of C272m@TiO<sub>2</sub> obtained from TDDFT and TDA for B3LYP. Dotted line indicate the experimental absorption maximum of the dye on titania.

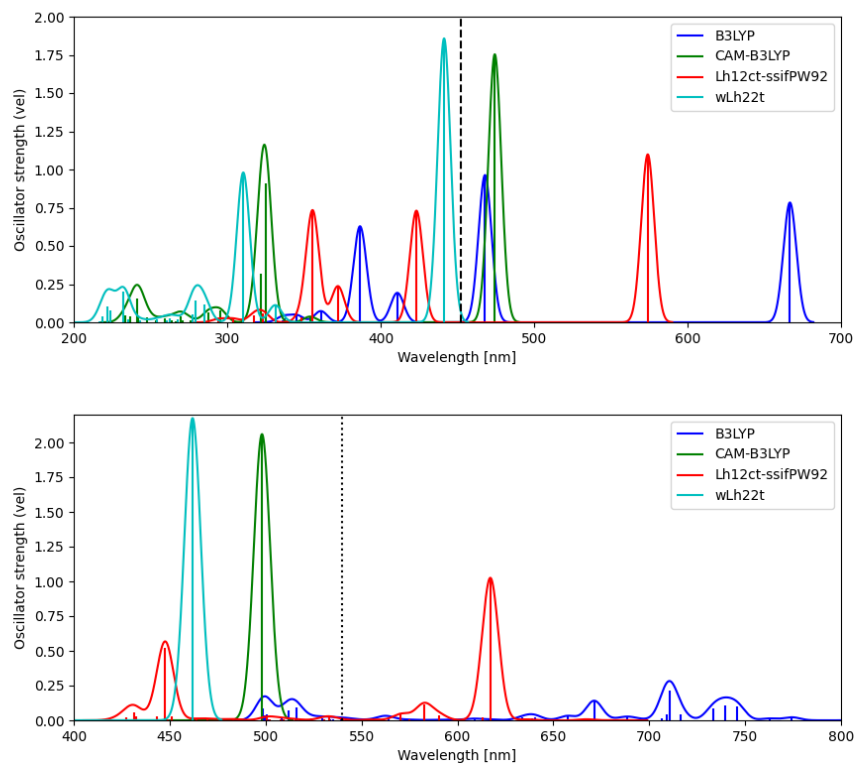

**Fig. 6** UV-Vis spectra of JK2 (top) and JK2@TiO<sub>2</sub> (bottom) calculated with TD-B3LYP/CAM-B3LYP/Lh12ct-SsifPW92/ $\omega$ Lh22t/def2-SVP(H<sub>2</sub>O)//B3LYP/def2-SVP(H<sub>2</sub>O). Dashed and dotted lines indicate the experimental lowest absorption maximum of the free dye and the dye on titania, respectively.

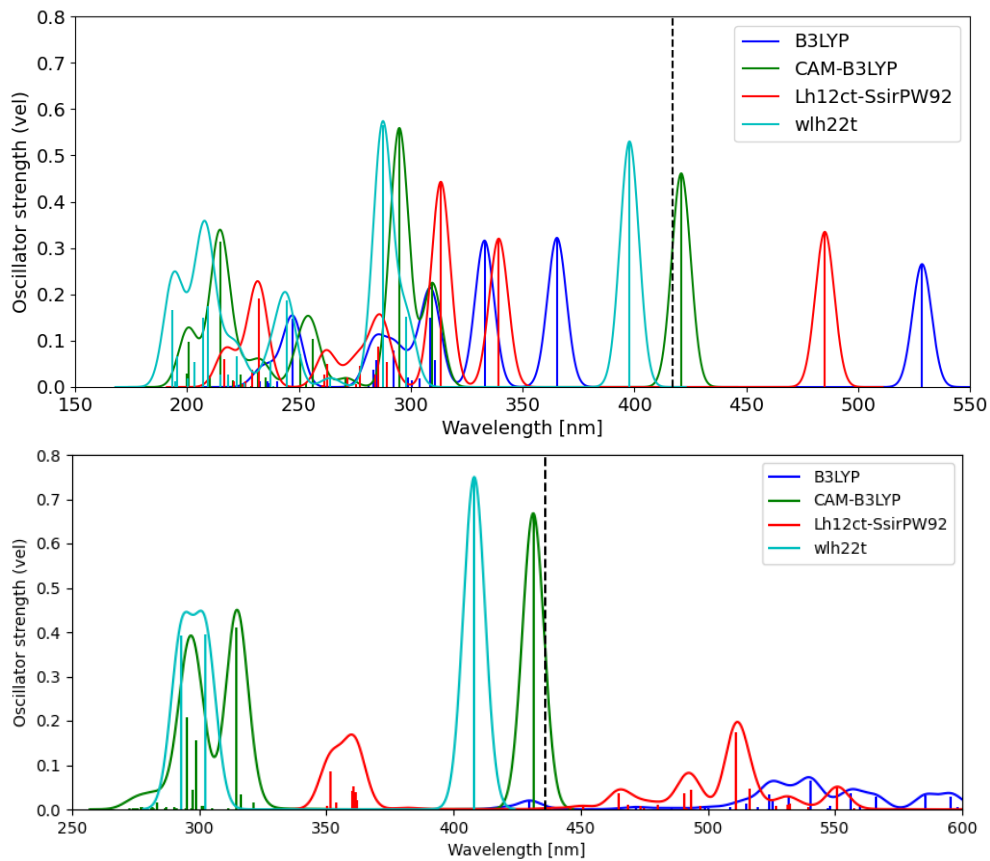

**Fig. 7** UV-Vis spectra of dye4 (top) and dye4@TiO<sub>2</sub> (bottom) calculated with TD-B3LYP/CAM-B3LYP/Lh12ct-SsifPW92/ $\omega$ Lh22t/def2-SVP(ACN)//B3LYP/def2-SVP(ACN). Dashed lines indicate the experimental lowest absorption maximum of the free dye and the dye on titania, respectively.

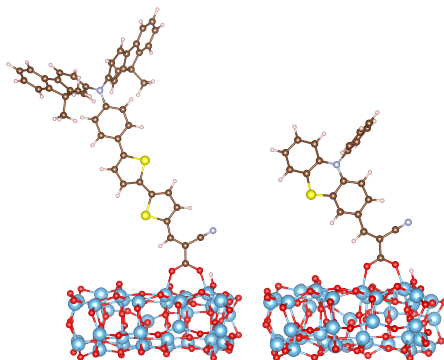

**Fig. 8** B3LYP/def2-SVP optimized structures of the organic dyes JK2 (left) and dye4 (right) anchored on a (TiO<sub>2</sub>)<sub>38</sub> cluster.

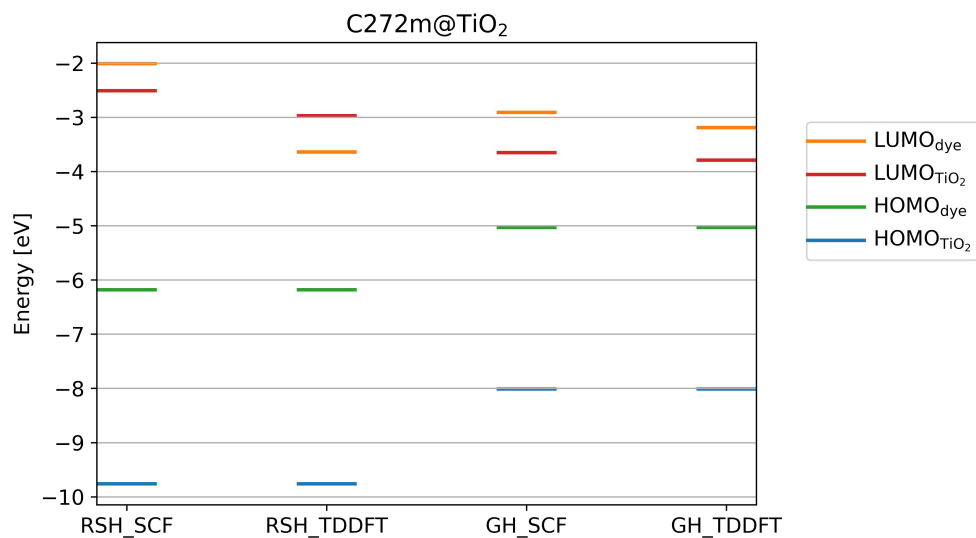

**Fig. 9** HOMO and LUMO level alignments for the dye and the TiO<sub>2</sub> in C272m@TiO<sub>2</sub> in the ground state (SCF) and excited state (TDDFT) calculated with RSH CAM-B3LYP and GH B3LYP. RSH CAM-B3LYP shows reversed level alignment in the excited state.

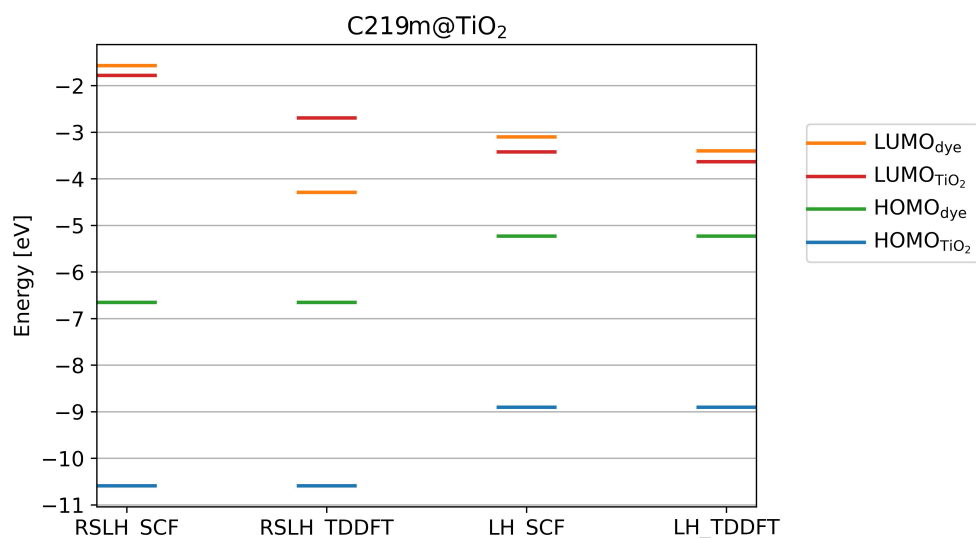

**Fig. 10** HOMO and LUMO level alignments for the dye and TiO<sub>2</sub> in C219m@TiO<sub>2</sub> in the ground state (SCF) and excited state (TDDFT) calculated with RSLH  $\omega$ Lh22t and LH Lh12ct-SsifPW92. RSLH  $\omega$ Lh22t shows reversed level alignment in the excited state.



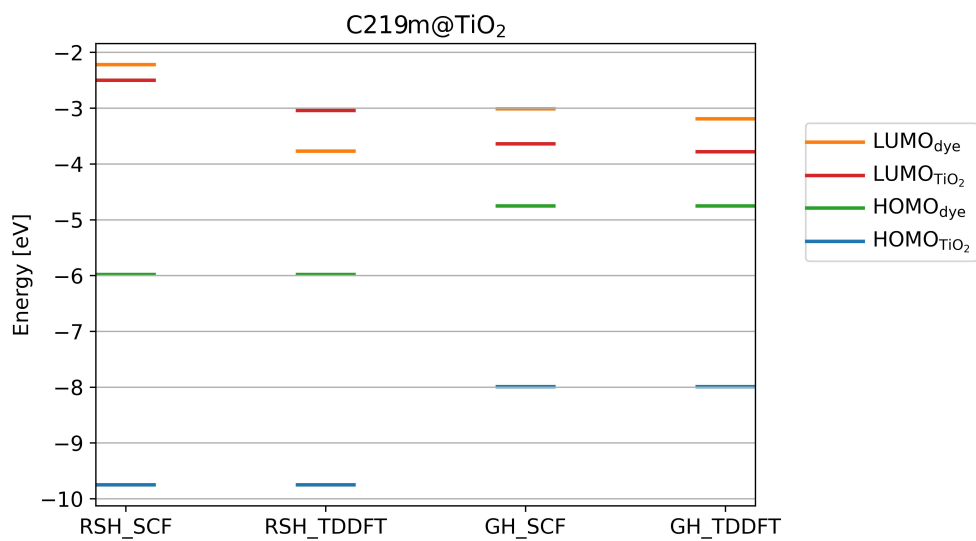

**Fig. 11** HOMO and LUMO level alignments for the dye and TiO<sub>2</sub> in C219m@TiO<sub>2</sub> in the ground state (SCF) and excited state (TDDFT) calculated with RSH CAM-B3LYP and GH B3LYP. RSH CAM-B3LYP shows reversed level alignment in the excited state.
